# Supplementary material for: Dual fluorescence in 9-amino-2,7,12,17-tetraphenylporphycene
Source: Royal Society of Chemistry journal article supplement (doi:10.1039/c0cp02654a), 2011-01-01
Supplement: c0cp02654a.pdf [file c0cp02654a.pdf]

## SUPPORTING INFORMATION

### Dual fluorescence in 9-amino-2,7,12,17-tetraphenylporphycene

Miquel Duran-Frigola, Roger Tejedor-Estrada, David Sánchez-García and Santi Nonell\*

*Grup d'Enginyeria Molecular, Institut Químic de Sarrià, Universitat Ramon Llull, Via Augusta 390, E-08017, Barcelona, Spain.*

### Solvent effects

Several solvents with reported solvatochromic features<sup>1</sup> were chosen to assess the effects of polarity ( $\pi^*$ ) and the ability to donate and accept hydrogen bonds ( $\alpha$  and  $\beta$ , respectively). No significant absorption and emission shifts were observed, but both steady state fluorescence intensity and decay lifetimes turned out to be highly solvent dependent (Table S1).

**Table S1** Steady state fluorescence intensities ( $F_1$  and  $F_2$ ,  $\lambda_{\text{exc}} = 647$  nm) and fluorescence lifetimes ( $\tau_1$  and  $\tau_2$ ,  $\lambda_{\text{exc}} = 596$  nm) measured in different solvents: toluene, tetrahydrofuran (THF), triethylamine (TEA), ethanol, dichloromethane (DCM), chloroform, ethyl acetate (AcOEt), and acetone. The  $F_1$  and  $F_2$  intensities were corrected for the sample absorbance and normalized relative to the largest  $F_1$  intensity.

|            | $F_1$ | $F_2$ | $\tau_1 / \text{ns}$ | $\tau_2 / \text{ns}$ |
|------------|-------|-------|----------------------|----------------------|
| Toluene    | 0.822 | 1.027 | 0.89                 | 1.79                 |
| THF        | 0.230 | 0.633 | 0.43                 | 1.14                 |
| TEA        | 0.382 | 0.152 | 0.58                 | 1.24                 |
| Ethanol    | 0.304 | 0.577 | 0.50                 | 1.08                 |
| DCM        | 0.790 | 0.770 | 0.71                 | 1.44                 |
| Chloroform | 1.000 | 0.906 | 0.80                 | 1.53                 |
| AcOEt      | 0.309 | 0.702 | 0.51                 | 1.48                 |
| Acetone    | 0.269 | 0.567 | 0.43                 | 1.17                 |

Table S2 shows the dependence of the normalized fluorescence intensity and the fluorescence lifetimes ( $\tau_1$  and  $\tau_2$ ) on the solvent parameters  $\alpha$ ,  $\beta$  and  $\pi^*$ . While the  $F_2$  intensity does not significantly correlate with none of the linear combinations of these parameters, the intensity of  $F_1$  shows a remarkable dependence on  $\beta$  and  $\pi^*$ . Similarly,  $\tau_1$  becomes faster when  $\pi^*$  and  $\beta$  are increased, but no significant correlation could be observed for the  $\tau_2$  values.

**Table S2** Multiple regression of normalized intensities ( $F_1$  and  $F_2$ ) and fluorescence lifetimes ( $\tau_1$  and  $\tau_2$ ) depending on the  $\alpha$ ,  $\beta$  and  $\pi^*$  parameters of the solvent shown in Table 1. Data were fitted to the equation  $Y = A\alpha + B\beta + P\pi^* + C$ , where  $Y$  is either the steady state normalized intensity or the fluorescence lifetime in ns.  $P$ -value and  $R^2$  are also shown.

|               | A      | B      | P      | C     | $P$ -value | $R^2$ |
|---------------|--------|--------|--------|-------|------------|-------|
| $F_1$         | 0.343  | -1.153 | -0.765 | 1.309 | < 0.001    | 0.988 |
| $F_2$         | 0.076  | -0.555 | 0.345  | 0.672 | 0.168      | 0.683 |
| $\tau_1$ / ns | 0.143  | -0.645 | -0.563 | 1.139 | 0.026      | 0.879 |
| $\tau_2$ / ns | -0.110 | -0.772 | -0.481 | 1.946 | 0.100      | 0.759 |

## Computational calculations

**Table S3** TD-DFT 6-31G(d) calculations for all possible tautomers of 9-ATPPo.  $E$  is the energy in eV and  $f$  is the oscillator strength of the corresponding transition from  $S_0$ . The ground state energy of *trans-1* has been used as reference.

| Tautomer       | State | $E/eV$ | $f$    | Main Configuration                   |
|----------------|-------|--------|--------|--------------------------------------|
| <i>trans-1</i> | $S_0$ | 0      |        |                                      |
|                | $S_1$ | 1.852  | 0.3088 | 68.85%(0-0), 10.39(1-1), 2.84%(1-0)  |
|                | $S_2$ | 2.241  | 0.3313 | 65.84%(1-0), 19.64(0-1)              |
| <i>trans-2</i> | $S_0$ | 0.009  |        |                                      |
|                | $S_1$ | 1.982  | 0.4383 | 67.01%(0-0), 10.82%(1-1)             |
|                | $S_2$ | 2.155  | 0.1714 | 71.13%(1-0), 19.15%(0-1)             |
| <i>cis-A1</i>  | $S_0$ | 0.074  |        |                                      |
|                | $S_1$ | 2.084  | 0.3790 | 63.05%(0-0), 10.09%(1-1), 8.72%(1-0) |
|                | $S_2$ | 2.249  | 0.2517 | 63.72%(1-0), 16.05%(0-1), 5.92%(0-0) |
| <i>cis-A2</i>  | $S_0$ | 0.097  |        |                                      |
|                | $S_1$ | 1.931  | 0.2935 | 66.76%(0-0), 8.86%(1-1), 4.43%(1-0)  |
|                | $S_2$ | 2.286  | 0.2861 | 63.65%(1-0), 20.33%(0-1), 3.08%(0-0) |
| <i>cis-B1</i>  | $S_0$ | 1.340  |        |                                      |
|                | $S_1$ | 3.221  | 0.3129 | 69.19%(0-0), 10.14%(1-1), 2.24%(2-0) |
|                | $S_2$ | 3.490  | 0.1368 | 66.26%(1-0), 13.64%(0-1), 6.39%(2-0) |
| <i>cis-B2</i>  | $S_0$ | 1.236  |        |                                      |
|                | $S_1$ | 3.104  | 0.2515 | 70.45%(0-0), 10.38%(1-1), 2.17%(2-0) |
|                | $S_2$ | 3.416  | 0.126  | 68.64%(1-0), 19.16%(0-1), 2.94%(3-0) |

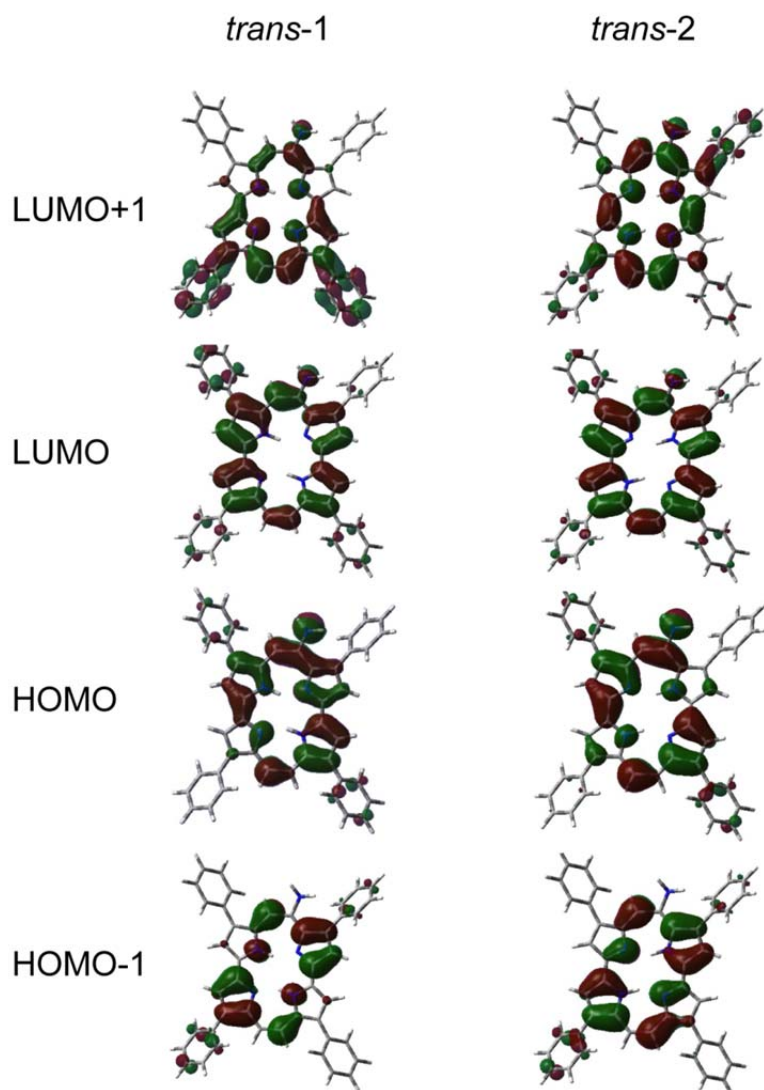

Fig. S1 Orbital topologies of *trans-1* and *trans-2*.

## References

1. M. J. Kamlet, J.L.M. Abboud, M.H. Abraham and R.W. Taft, *J. Org. Chem.*, 1983, **48**, 2877–2887.
